# Supplementary material for: Evaluating the effects of supplementing ward nurses on quality of newborn care in Kenyan neonatal units: protocol for a prospective workforce intervention study
Source: Springer Nature journal article supplement (doi:10.1186/s12913-022-08597-9), 2022-10-04
Supplement: MOESM1 [file 23569982]

CIN Hospital code |\_\_|\_\_|

Subject ID |\_\_|\_\_|

**Neonatal nursing care observational checklist**

|                                                                                                       |                                                                                                     |                                                                |                                                                    |
|-------------------------------------------------------------------------------------------------------|-----------------------------------------------------------------------------------------------------|----------------------------------------------------------------|--------------------------------------------------------------------|
| Date of completion                                                                                    | _ _ / _ _ / _ _ _ _ <br>(DD/MM/YYYY)                                                                |                                                                |                                                                    |
| Observer code                                                                                         | _ _  (e.g., 01)                                                                                     |                                                                |                                                                    |
| <b>Subject ID</b>                                                                                     | _ _ - _ _  (4-digit code (first 2 digits, hospital code and last 2-digit, patient number e.g., 10)) | In-patient number<br><input type="text"/>                      |                                                                    |
| <b>Part A – Shift information (Tick as appropriate)</b>                                               |                                                                                                     |                                                                |                                                                    |
| Q 1. Shift type                                                                                       |                                                                                                     |                                                                |                                                                    |
| Weekday day                                                                                           | <input type="checkbox"/>                                                                            | Weekday night                                                  | <input type="checkbox"/>                                           |
| Weekend day                                                                                           | <input type="checkbox"/>                                                                            | Weekend night                                                  | <input type="checkbox"/>                                           |
| Q 2. Observation period                                                                               |                                                                                                     |                                                                |                                                                    |
| Start Date                                                                                            | _ _ / _ _ / _ _ _ _ <br>(DD/MM/YYYY)                                                                | Start time                                                     | _ _ : _ _ <br>(Please use 24-hour timing e.g., 23:59, not 11:59pm) |
| End Date                                                                                              | _ _ / _ _ / _ _ _ _ <br>(DD/MM/YYYY)                                                                | End time                                                       | _ _ : _ _ <br>(Please use 24-hour timing e.g., 23:59, not 11:59pm) |
| Q 3. Total number of patients in the ward (Include all babies including those in KMC and acute rooms) | _ _ _                                                                                               | Number of babies on CPAP                                       | _ _                                                                |
|                                                                                                       |                                                                                                     | Number of babies on Oxygen                                     | _ _                                                                |
|                                                                                                       |                                                                                                     | Number of babies on IV therapy (medications/ fluids)           | _ _                                                                |
|                                                                                                       |                                                                                                     | Number of babies on Phototherapy                               | _ _                                                                |
|                                                                                                       |                                                                                                     | Number of babies requiring nasogastric tube/orogastric feeding | _ _                                                                |
|                                                                                                       |                                                                                                     | Number of babies requiring incubator care                      | _ _                                                                |
| Q 4 Is there an extra KMC Ward/ room managed by the NBU nurses?                                       | Yes <input type="checkbox"/>                                                                        | Number of babies on the KMC ward                               |                                                                    |
|                                                                                                       | No <input type="checkbox"/>                                                                         | _ _                                                            |                                                                    |

|                                                                                                                 |                                                          |                                                        |                                                      |                          |                          |
|-----------------------------------------------------------------------------------------------------------------|----------------------------------------------------------|--------------------------------------------------------|------------------------------------------------------|--------------------------|--------------------------|
| Q 5 Is there an acute room present in the NBU?                                                                  |                                                          | Yes <input type="checkbox"/>                           | How many babies are present in this room?            |                          |                          |
|                                                                                                                 |                                                          | No <input type="checkbox"/>                            | __ __                                                |                          |                          |
| Q6. Number of nurses on current 12-hour shift                                                                   |                                                          | Actual (Based on observations)                         |                                                      |                          |                          |
|                                                                                                                 |                                                          | Morning shift (07:30 – 12:30) <input type="checkbox"/> | Night shift (18:30 – 07:30) <input type="checkbox"/> |                          |                          |
| <b>Comment:</b>                                                                                                 | Evening shift (07:30 – 16:30) <input type="checkbox"/>   |                                                        | Others _____                                         | <input type="checkbox"/> |                          |
|                                                                                                                 | Afternoon shift (12:30 – 18:30) <input type="checkbox"/> |                                                        |                                                      |                          |                          |
| Q 7. Device check. On the current shift, how many of the following devices below are present and functional     |                                                          |                                                        |                                                      |                          |                          |
| Glucometer (If no strips, put as 0)                                                                             | <input type="checkbox"/>                                 | Weighing scale                                         | <input type="checkbox"/>                             | Pulse oximeter           | <input type="checkbox"/> |
| Thermometer (owned by the unit)                                                                                 | <input type="checkbox"/>                                 | Stethoscopes (owned by the unit)                       | <input type="checkbox"/>                             |                          |                          |
| <b>Instruction: Please reconcile the following information below at end of the shift</b>                        |                                                          |                                                        |                                                      |                          |                          |
| Q 8. How many of the following processes occurred during the shift?                                             |                                                          | Admissions                                             |                                                      | __                       |                          |
|                                                                                                                 |                                                          | Discharges                                             |                                                      | __                       |                          |
|                                                                                                                 |                                                          | Referrals                                              |                                                      | __                       |                          |
|                                                                                                                 |                                                          | Deaths                                                 |                                                      | __                       |                          |
| Q 9. How many of the following staff cadres were present on this shift?                                         |                                                          | Medical officer                                        |                                                      | __                       |                          |
|                                                                                                                 |                                                          | Clinical Officer Interns                               |                                                      | __                       |                          |
|                                                                                                                 |                                                          | Medical officer interns                                |                                                      | __                       |                          |
|                                                                                                                 |                                                          | Nursing officer interns                                |                                                      | __                       |                          |
|                                                                                                                 |                                                          | Nursing students                                       |                                                      | __                       |                          |
|                                                                                                                 |                                                          | Others _____                                           |                                                      | __                       |                          |
|                                                                                                                 |                                                          | Others _____                                           |                                                      | __                       |                          |
| Q 10. Was the ward-in-charge or deputy ward-in-charge present at any time during the 12-hour observation period |                                                          | Yes <input type="checkbox"/>                           |                                                      |                          |                          |

CIN Hospital code |\_\_|\_\_|

Subject ID |\_\_|\_\_|

|                                                                                             |                                             |                                              |           |
|---------------------------------------------------------------------------------------------|---------------------------------------------|----------------------------------------------|-----------|
|                                                                                             |                                             | No <input type="checkbox"/>                  |           |
| <b>Part B – Baby’s biodata (Tick as appropriate)</b>                                        |                                             |                                              |           |
| Q 11. Care category                                                                         |                                             |                                              |           |
| Category A (Critical/HDU) <input type="checkbox"/>                                          | Category B (Acute) <input type="checkbox"/> | Category C (Stable) <input type="checkbox"/> |           |
| Q 12. Date of admission                                                                     |                                             |                                              |           |
| _ _ / _ _ / _ _ _ _ <br>(DD/MM/YYYY)                                                        |                                             |                                              |           |
| Q 13. Current age (write in days if above 24 hours old, if less than please write in hours) |                                             | Hours  _ _                                   | Days  _ _ |
| Q14. Gender                                                                                 |                                             |                                              |           |
| Male <input type="checkbox"/> Female <input type="checkbox"/>                               |                                             |                                              |           |
| Q 15. Current diagnosis                                                                     |                                             | Diagnosis 1 (Primary diagnosis)              |           |
|                                                                                             |                                             | _____                                        |           |
|                                                                                             |                                             | Diagnosis 2 (Secondary diagnosis)            |           |
|                                                                                             |                                             | _____                                        |           |
|                                                                                             |                                             | Diagnosis 3 (Secondary diagnosis)            |           |
|                                                                                             |                                             | _____                                        |           |
|                                                                                             |                                             | Other diagnosis                              |           |
|                                                                                             |                                             | _____                                        |           |
| Q 16. Birth weight (grams)                                                                  |                                             |                                              |           |
| _ _ _ _                                                                                     |                                             |                                              |           |
| Q 17. Current weight (Most recent weight in grams)                                          |                                             |                                              |           |
| _ _ _ _                                                                                     |                                             |                                              |           |

CIN Hospital code |\_\_|\_\_|

Subject ID |\_\_|\_\_|

| Nursing tasks                                                                               | Task frequency | Expected number within current 12-hour shift | Tasks done (Insert Y, if yes and N if no) | Time tasks done          | Comment |
|---------------------------------------------------------------------------------------------|----------------|----------------------------------------------|-------------------------------------------|--------------------------|---------|
| <b>Routine nursing care</b>                                                                 |                |                                              |                                           |                          |         |
| Nurses handing over patient                                                                 |                | 1                                            | <input type="checkbox"/>                  | <input type="checkbox"/> |         |
| Patient assessment before shift                                                             |                | 1                                            | <input type="checkbox"/>                  | <input type="checkbox"/> |         |
| Nurse washes / sanitises hands before patient assessment (Assess the first patient contact) |                | 1                                            | <input type="checkbox"/>                  | <input type="checkbox"/> |         |
| Nurse attends the ward round with doctor (s) to see patient. (If nurse student, mark as no) |                | 1                                            | <input type="checkbox"/>                  | <input type="checkbox"/> |         |
| Nurse communicates with caregiver details of care/ counsels the caregiver                   |                | 1                                            | <input type="checkbox"/>                  | <input type="checkbox"/> |         |

CIN Hospital code |\_\_|\_\_|

Subject ID |\_\_|\_\_|

| Nursing tasks          | Task frequency (Circle option) | Expected number within current 12-hour shift | Tasks done (Insert Y, if yes and N if no) | Task performed by (N for nurse, NS* –Student nurse, M-Caregiver/ Mother, W-ward clerk) | Time tasks done      | Comment |
|------------------------|--------------------------------|----------------------------------------------|-------------------------------------------|----------------------------------------------------------------------------------------|----------------------|---------|
| Temperature check      | 4/6/12 hourly                  | 1 /2 /3                                      | <input type="checkbox"/>                  | <input type="checkbox"/>                                                               | <input type="text"/> |         |
|                        |                                |                                              | <input type="checkbox"/>                  | <input type="checkbox"/>                                                               | <input type="text"/> |         |
|                        |                                |                                              | <input type="checkbox"/>                  | <input type="checkbox"/>                                                               | <input type="text"/> |         |
| Pulse/heart rate check | 4/6/12 hourly                  | 1 /2 /3                                      | <input type="checkbox"/>                  | <input type="checkbox"/>                                                               | <input type="text"/> |         |
|                        |                                |                                              | <input type="checkbox"/>                  | <input type="checkbox"/>                                                               | <input type="text"/> |         |
|                        |                                |                                              | <input type="checkbox"/>                  | <input type="checkbox"/>                                                               | <input type="text"/> |         |
| Respiratory rate       | 4/6/12 hourly                  | 1/ 2 /3                                      | <input type="checkbox"/>                  | <input type="checkbox"/>                                                               | <input type="text"/> |         |
|                        |                                |                                              | <input type="checkbox"/>                  | <input type="checkbox"/>                                                               | <input type="text"/> |         |
|                        |                                |                                              | <input type="checkbox"/>                  | <input type="checkbox"/>                                                               | <input type="text"/> |         |
| Pulse oximetry         | 4/6/12 hourly                  | 1/ 2 /3                                      | <input type="checkbox"/>                  | <input type="checkbox"/>                                                               | <input type="text"/> |         |
|                        |                                |                                              | <input type="checkbox"/>                  | <input type="checkbox"/>                                                               | <input type="text"/> |         |
|                        |                                |                                              | <input type="checkbox"/>                  | <input type="checkbox"/>                                                               | <input type="text"/> |         |

\*- Task performed by a nursing student under supervision should be termed as done by a nurse

CIN Hospital code |\_\_|\_\_|

Subject ID |\_\_|\_\_|

| Nursing tasks<br>(routine newborn care) | Task frequency<br>(Circle option) | Expected number within current 12-hour shift | Tasks done (Insert Y, if yes and N if no) | Task performed by (N for nurse, NS* –Student nurse, M-Caregiver/ Mother, W-ward clerk) | Time tasks done | Comment |
|-----------------------------------------|-----------------------------------|----------------------------------------------|-------------------------------------------|----------------------------------------------------------------------------------------|-----------------|---------|
| Cleaning baby                           |                                   | 1                                            | <input type="checkbox"/>                  | <input type="checkbox"/>                                                               |                 |         |
| Linen change                            |                                   | 1                                            | <input type="checkbox"/>                  | <input type="checkbox"/>                                                               |                 |         |
| Weight check                            |                                   | 1                                            | <input type="checkbox"/>                  | <input type="checkbox"/>                                                               |                 |         |
| Checking incubator settings             |                                   | 1                                            | <input type="checkbox"/>                  | <input type="checkbox"/>                                                               |                 |         |
| Diaper change                           |                                   | 1                                            | <input type="checkbox"/>                  | <input type="checkbox"/>                                                               |                 |         |
| Cord care                               |                                   | 1                                            | <input type="checkbox"/>                  | <input type="checkbox"/>                                                               |                 |         |
| Turning the baby                        |                                   | 4                                            | <input type="checkbox"/>                  | <input type="checkbox"/>                                                               |                 |         |
|                                         | <input type="checkbox"/>          |                                              | <input type="checkbox"/>                  |                                                                                        |                 |         |
|                                         | <input type="checkbox"/>          |                                              | <input type="checkbox"/>                  |                                                                                        |                 |         |
|                                         | <input type="checkbox"/>          |                                              | <input type="checkbox"/>                  |                                                                                        |                 |         |

\*- Task performed by a nursing student under supervision should be termed as done by a nurse

CIN Hospital code |\_\_|\_\_|

Subject ID |\_\_|\_\_|

| Nursing tasks<br>(Feeding)                                                                                                                                                                 | Task frequency<br>(Circle option) | Expected number within current 12-hour shift | Tasks done (Insert Y, if yes and N if no) | Task performed by (N for nurse, NS* –Student nurse, M-Caregiver/ Mother, W- ward clerk) | Time tasks done      | Comment |
|--------------------------------------------------------------------------------------------------------------------------------------------------------------------------------------------|-----------------------------------|----------------------------------------------|-------------------------------------------|-----------------------------------------------------------------------------------------|----------------------|---------|
| Breastfeeding <input type="checkbox"/><br>Cup/spoon feeding <input type="checkbox"/><br>Nasogastric/ Oro-gastric tube <input type="checkbox"/><br>No oral feeding <input type="checkbox"/> | 3-hourly                          | 4                                            | <input type="checkbox"/>                  | <input type="checkbox"/>                                                                | <input type="text"/> |         |
|                                                                                                                                                                                            |                                   |                                              | <input type="checkbox"/>                  | <input type="checkbox"/>                                                                | <input type="text"/> |         |
|                                                                                                                                                                                            |                                   |                                              | <input type="checkbox"/>                  | <input type="checkbox"/>                                                                | <input type="text"/> |         |
|                                                                                                                                                                                            |                                   |                                              | <input type="checkbox"/>                  | <input type="checkbox"/>                                                                | <input type="text"/> |         |
| <b>NG Tube feeding process &amp;</b>                                                                                                                                                       |                                   |                                              |                                           |                                                                                         |                      |         |
| Check tube positioning                                                                                                                                                                     | 3-hourly                          | 4                                            | <input type="checkbox"/>                  | <input type="checkbox"/>                                                                |                      |         |
|                                                                                                                                                                                            |                                   |                                              | <input type="checkbox"/>                  | <input type="checkbox"/>                                                                |                      |         |
|                                                                                                                                                                                            |                                   |                                              | <input type="checkbox"/>                  | <input type="checkbox"/>                                                                |                      |         |
|                                                                                                                                                                                            |                                   |                                              | <input type="checkbox"/>                  | <input type="checkbox"/>                                                                |                      |         |
| Measure feeds                                                                                                                                                                              | 3-hourly                          | 4                                            | <input type="checkbox"/>                  | <input type="checkbox"/>                                                                |                      |         |
|                                                                                                                                                                                            |                                   |                                              | <input type="checkbox"/>                  | <input type="checkbox"/>                                                                |                      |         |
|                                                                                                                                                                                            |                                   |                                              | <input type="checkbox"/>                  | <input type="checkbox"/>                                                                |                      |         |
|                                                                                                                                                                                            |                                   |                                              | <input type="checkbox"/>                  | <input type="checkbox"/>                                                                |                      |         |

CIN Hospital code |\_\_|\_\_|

Subject ID |\_\_|\_\_|

|                                 |          |   |                          |                          |                                                                                     |  |
|---------------------------------|----------|---|--------------------------|--------------------------|-------------------------------------------------------------------------------------|--|
| Position the baby after feeding | 3-hourly | 4 | <input type="checkbox"/> | <input type="checkbox"/> | 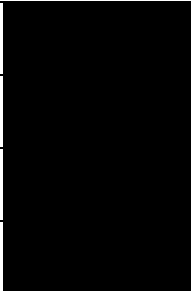 |  |
|                                 |          |   | <input type="checkbox"/> | <input type="checkbox"/> |                                                                                     |  |
|                                 |          |   | <input type="checkbox"/> | <input type="checkbox"/> |                                                                                     |  |
|                                 |          |   | <input type="checkbox"/> | <input type="checkbox"/> |                                                                                     |  |

& - Complete for only NG-tube fed babies



CIN Hospital code |\_\_|\_\_|

Subject ID |\_\_|\_\_|

| Nursing tasks<br>(Medication)                                          | Task frequency<br>(Please circle) | Expected number within current 12-hour shift | Tasks done (Insert Y, if yes and N if no) | Time tasks done          |  | Comment |
|------------------------------------------------------------------------|-----------------------------------|----------------------------------------------|-------------------------------------------|--------------------------|--|---------|
| <b>IV Medication</b>                                                   |                                   |                                              |                                           |                          |  |         |
| Drug name<br>_____                                                     | 6/8/12/24<br>hourly               | __                                           | <input type="checkbox"/>                  | <input type="checkbox"/> |  |         |
|                                                                        |                                   |                                              | <input type="checkbox"/>                  | <input type="checkbox"/> |  |         |
| Drug name<br>_____                                                     | 6/8/12/24<br>hourly               | __                                           | <input type="checkbox"/>                  | <input type="checkbox"/> |  |         |
|                                                                        |                                   |                                              | <input type="checkbox"/>                  | <input type="checkbox"/> |  |         |
| Drug name<br>_____                                                     | 6/8/12/24<br>hourly               | __                                           | <input type="checkbox"/>                  | <input type="checkbox"/> |  |         |
|                                                                        |                                   |                                              | <input type="checkbox"/>                  | <input type="checkbox"/> |  |         |
| Drug name<br>_____                                                     | 6/8/12/24<br>hourly               | __                                           | <input type="checkbox"/>                  | <input type="checkbox"/> |  |         |
|                                                                        |                                   |                                              | <input type="checkbox"/>                  | <input type="checkbox"/> |  |         |
|                                                                        |                                   |                                              |                                           |                          |  |         |
| 6 hourly – QDS/QID, 8 hourly – TDS/TID, 12 hourly – BD, 24 hourly - OD |                                   |                                              |                                           |                          |  |         |

CIN Hospital code |\_\_|\_\_|

Subject ID |\_\_|\_\_|

| Nursing tasks (Medication)                                                                      | Task frequency | Expected number within current 12-hour shift | Tasks done (Insert Y, if yes and N if no, E if not determined) | Time tasks done          | Task performed by (N for nurse, NS* –Student nurse, M-Caregiver/ Mother, W-ward clerk ) | Comment |
|-------------------------------------------------------------------------------------------------|----------------|----------------------------------------------|----------------------------------------------------------------|--------------------------|-----------------------------------------------------------------------------------------|---------|
| <b>Oral Medication</b>                                                                          |                |                                              |                                                                |                          |                                                                                         |         |
| Drug name                                                                                       | 12/24 hourly   | __                                           | <input type="checkbox"/>                                       | <input type="checkbox"/> | <input type="checkbox"/>                                                                |         |
| Drug name                                                                                       | 12/24 hourly   | __                                           | <input type="checkbox"/>                                       | <input type="checkbox"/> | <input type="checkbox"/>                                                                |         |
| Drug name                                                                                       | 12/24 hourly   | __                                           | <input type="checkbox"/>                                       | <input type="checkbox"/> | <input type="checkbox"/>                                                                |         |
| Drug name                                                                                       | 12/24 hourly   | __                                           | <input type="checkbox"/>                                       | <input type="checkbox"/> | <input type="checkbox"/>                                                                |         |
| <b>IV Medication delivery process (Perform this observation for first round of medications)</b> |                |                                              |                                                                |                          |                                                                                         |         |
| Review of treatment sheet                                                                       |                |                                              | <input type="checkbox"/>                                       |                          |                                                                                         |         |
| Cannula flush with saline before drug administration                                            |                |                                              | <input type="checkbox"/>                                       |                          |                                                                                         |         |
| Cannula flush with saline after drug administration                                             |                |                                              | <input type="checkbox"/>                                       |                          |                                                                                         |         |

CIN Hospital code |\_\_|\_\_|

Subject ID |\_\_|\_\_|

| Nursing tasks<br>(Special newborn care)    | Task frequency | Expected number within current 12-hour shift | Tasks done (Y=yes, N=no) | Time tasks done | Comment |
|--------------------------------------------|----------------|----------------------------------------------|--------------------------|-----------------|---------|
| <b>Phototherapy</b>                        |                |                                              |                          |                 |         |
| Turning/positioning                        | 4 hourly       | 3                                            | <input type="checkbox"/> |                 |         |
|                                            |                |                                              | <input type="checkbox"/> |                 |         |
|                                            |                |                                              | <input type="checkbox"/> |                 |         |
| Skin assessment                            | 6 hourly       | 2                                            | <input type="checkbox"/> |                 |         |
|                                            |                |                                              | <input type="checkbox"/> |                 |         |
| Eye care                                   | 12 hourly      | 1                                            | <input type="checkbox"/> |                 |         |
| Changing eye pads                          | 12 hourly      | 1                                            | <input type="checkbox"/> |                 |         |
| <b>Continuous Positive Airway Pressure</b> |                |                                              |                          |                 |         |
| Checking nasal prong position              | 4 hourly       | 3                                            | <input type="checkbox"/> |                 |         |
|                                            |                |                                              | <input type="checkbox"/> |                 |         |
|                                            |                |                                              | <input type="checkbox"/> |                 |         |
| Checking oxygen flow rate                  | 4 hourly       | 3                                            | <input type="checkbox"/> |                 |         |
|                                            |                |                                              | <input type="checkbox"/> |                 |         |

CIN Hospital code |\_\_|\_\_|

Subject ID |\_\_|\_\_|

|                                     |  |  |                          |  |  |
|-------------------------------------|--|--|--------------------------|--|--|
|                                     |  |  | <input type="checkbox"/> |  |  |
|                                     |  |  | <input type="checkbox"/> |  |  |
| <b>Kangaroo Mother Care</b>         |  |  |                          |  |  |
| Supervision of<br>mother during KMC |  |  | <input type="checkbox"/> |  |  |

CIN Hospital code |\_\_|\_\_|

Subject ID |\_\_|\_\_|

| Documentation of tasks (source)               | Not Done (Please tick)   | Done (Please tick)       | If done, how many times (Please write number) | Comments |
|-----------------------------------------------|--------------------------|--------------------------|-----------------------------------------------|----------|
| Neonatal assessment by nurse (Nursing cardex) | <input type="checkbox"/> | <input type="checkbox"/> |                                               |          |
| Nursing care plan (Nursing cardex/ care plan) | <input type="checkbox"/> | <input type="checkbox"/> |                                               |          |
| Temperature measurements                      | <input type="checkbox"/> | <input type="checkbox"/> | <input type="text"/>                          |          |
| Heart rate                                    | <input type="checkbox"/> | <input type="checkbox"/> | <input type="text"/>                          |          |
| Respiratory rate                              | <input type="checkbox"/> | <input type="checkbox"/> | <input type="text"/>                          |          |
| Oxygen saturation                             | <input type="checkbox"/> | <input type="checkbox"/> | <input type="text"/>                          |          |
| Ward round details                            | <input type="checkbox"/> | <input type="checkbox"/> |                                               |          |
| Frequency and volume of feed                  | <input type="checkbox"/> | <input type="checkbox"/> | <input type="text"/>                          |          |
| Health talks/ Communication to parents        | <input type="checkbox"/> | <input type="checkbox"/> | <input type="text"/>                          |          |
| Volume of IV fluids                           | <input type="checkbox"/> | <input type="checkbox"/> | <input type="text"/>                          |          |
| Weight check                                  | <input type="checkbox"/> | <input type="checkbox"/> | <input type="text"/>                          |          |
